# Supplementary material for: Carcinogenic Activity and Risk Assessment of PAHs in Ambient Air: PM10 Particle Fraction and Bulk Deposition
Source: MDPI journal article supplement (doi:10.3390/toxics11030228), 2023-02-27
Supplement: s1 [file s1]

# **Supplementary Material for “Carcinogenic activity and risk assessment of PAHs in ambient air: PM<sub>10</sub> particle fraction and bulk deposition”**

## **Toxics**

Ivana Jakovljević <sup>1</sup>, Iva Smoljo <sup>1,\*</sup>, Zdravka Sever Štrukil <sup>1</sup> and Gordana Pehnec <sup>1</sup>

<sup>1</sup>Environmental Hygiene Unit, Institute for Medical Research and Occupational Health,  
10000 Zagreb, Croatia

\*Correspondence:

Iva Smoljo

Institute for Medical Research and Occupational Health

Ksaverska c. 2, 10000 Zagreb, Croatia

E-mail: [ismoljo@imi.hr](mailto:ismoljo@imi.hr)

**Table S1.** Average equivalent BaP<sub>eq</sub> mass concentrations of individual toxic PAHs in: a) the PM<sub>10</sub> particle fraction and b) bulk deposition

| a)        | ng m <sup>-3</sup>  |         |       |        |       |       |        |       |       |       |        |
|-----------|---------------------|---------|-------|--------|-------|-------|--------|-------|-------|-------|--------|
|           | Flu                 | Pyr     | BaA   | Chry   | BbF   | BkF   | BaP    | DahA  | BghiP | IP    | ΣBaPeq |
| June      | 0.00004             | 0.00004 | 0.003 | 0.001  | 0.008 | 0.003 | 0.048  | 0.009 | 0.001 | 0.007 | 0.079  |
| July      | 0.00002             | 0.00002 | 0.002 | 0.0004 | 0.006 | 0.002 | 0.034  | 0.007 | 0.001 | 0.006 | 0.057  |
| August    | 0.0001              | 0.0001  | 0.004 | 0.001  | 0.012 | 0.005 | 0.076  | 0.020 | 0.001 | 0.011 | 0.130  |
| September | 0.0001              | 0.0001  | 0.006 | 0.001  | 0.021 | 0.008 | 0.156  | 0.021 | 0.002 | 0.021 | 0.236  |
| October   | 0.0003              | 0.0003  | 0.025 | 0.004  | 0.097 | 0.038 | 0.804  | 0.102 | 0.009 | 0.103 | 1.183  |
| November  | 0.001               | 0.001   | 0.089 | 0.015  | 0.230 | 0.091 | 1.912  | 0.276 | 0.018 | 0.211 | 2.843  |
| December  | 0.001               | 0.001   | 0.119 | 0.021  | 0.307 | 0.121 | 2.418  | 0.372 | 0.024 | 0.265 | 3.647  |
| January   | 0.001               | 0.001   | 0.128 | 0.021  | 0.295 | 0.117 | 2.319  | 0.320 | 0.024 | 0.261 | 3.488  |
| February  | 0.001               | 0.001   | 0.108 | 0.016  | 0.243 | 0.097 | 1.873  | 0.328 | 0.020 | 0.196 | 2.882  |
| March     | 0.0002              | 0.0002  | 0.034 | 0.005  | 0.103 | 0.043 | 0.748  | 0.161 | 0.010 | 0.096 | 1.200  |
| April     | 0.0002              | 0.0002  | 0.012 | 0.002  | 0.043 | 0.016 | 0.290  | 0.035 | 0.004 | 0.040 | 0.443  |
| May       | 0.0001              | 0.0001  | 0.005 | 0.001  | 0.015 | 0.006 | 0.103  | 0.021 | 0.001 | 0.016 | 0.168  |
| b)        | ng mL <sup>-1</sup> |         |       |        |       |       |        |       |       |       |        |
|           | Flu                 | Pyr     | BaA   | Chry   | BbF   | BkF   | BaP    | DahA  | BghiP | IP    | ΣBaPeq |
| June      | 0.021               | 0.029   | 0.271 | 0.099  | 0.562 | 0.333 | 2.367  | 0.000 | 0.033 | 0.381 | 4.096  |
| July      | 0.069               | 0.029   | 0.119 | 0.097  | 0.368 | 0.204 | 0.836  | 0.000 | 0.017 | 0.206 | 1.945  |
| August    | 0.040               | 0.018   | 0.621 | 0.111  | 0.655 | 0.000 | 3.601  | 0.000 | 0.052 | 0.480 | 5.578  |
| September | 0.034               | 0.030   | 1.478 | 0.229  | 1.924 | 0.886 | 10.693 | 1.999 | 0.108 | 1.253 | 18.633 |
| October   | 0.031               | 0.015   | 0.325 | 0.128  | 0.833 | 0.401 | 2.802  | 0.338 | 0.055 | 0.566 | 5.494  |

|          |       |       |       |       |        |       |        |        |       |       |        |
|----------|-------|-------|-------|-------|--------|-------|--------|--------|-------|-------|--------|
| November | 0.166 | 0.123 | 5.449 | 1.439 | 10.730 | 3.970 | 28.479 | 0.000  | 0.549 | 6.696 | 57.602 |
| December | 0.185 | 0.095 | 1.965 | 0.584 | 2.759  | 1.026 | 4.929  | 0.924  | 0.101 | 1.433 | 14.001 |
| January  | 0.123 | 0.075 | 1.221 | 0.453 | 2.440  | 0.863 | 7.405  | 0.000  | 0.118 | 1.486 | 14.186 |
| February | 0.175 | 0.111 | 3.711 | 0.791 | 6.138  | 2.566 | 24.845 | 0.000  | 0.369 | 3.680 | 42.387 |
| March    | 0.077 | 0.067 | 2.199 | 0.529 | 4.179  | 1.615 | 20.440 | 8.196  | 0.246 | 2.501 | 40.047 |
| April    | 0.080 | 0.069 | 2.381 | 0.835 | 4.444  | 1.896 | 24.045 | 13.438 | 0.289 | 3.099 | 50.575 |
| May      | 0.030 | 0.016 | 0.557 | 0.152 | 1.321  | 0.743 | 6.994  | 2.598  | 0.139 | 0.993 | 13.543 |

---

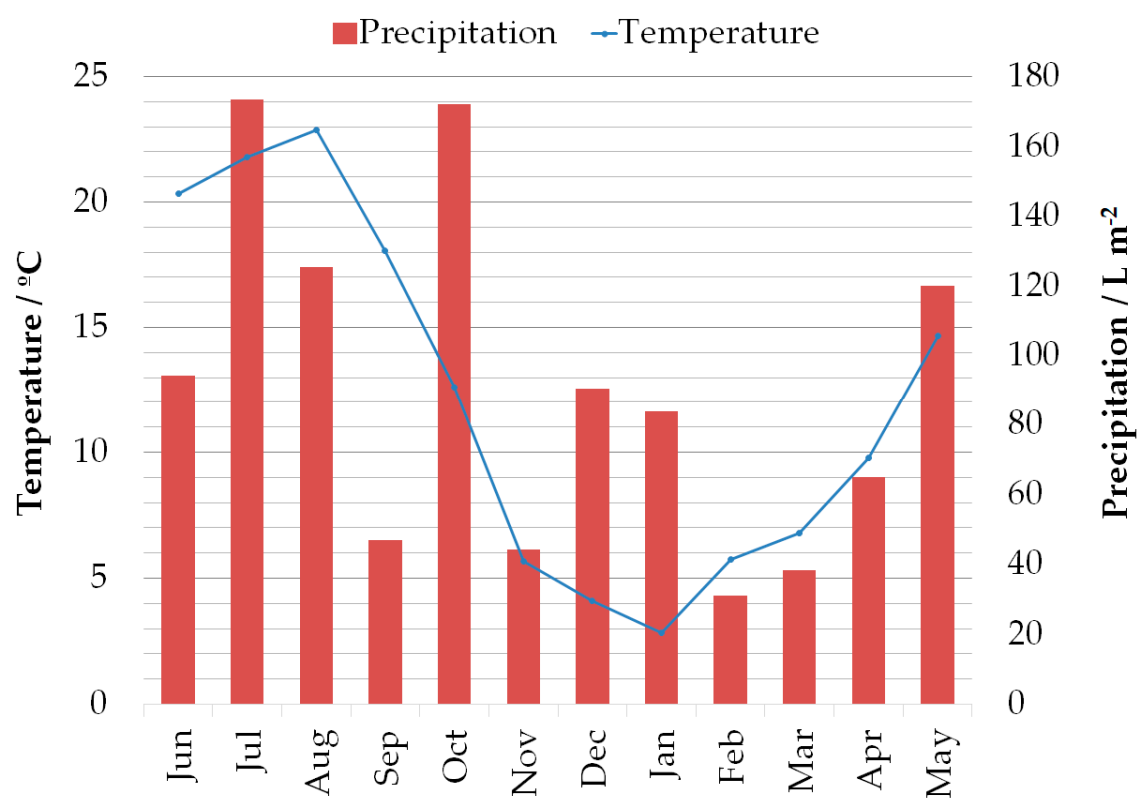

**Figure S1.** Meteorological conditions in Zagreb, Croatia during the sampling period (June 2020 - May 2021).
